# Supplementary material for: Organic fouling of membrane distillation for shale gas fracturing flowback water desalination: a special interest in the feed properties by pretreatment
Source: Royal Society of Chemistry journal article supplement (doi:10.1039/c9ew00334g), 2019-01-01
Supplement: c9ew00334g1.pdf [file c9ew00334g1.pdf]

1

2

## Supporting information

3

4

### Organic fouling of membrane distillation for shale gas

5

### flowback water desalination: an especial interest in the feed

6

### properties by pretreatment

7

Fan-xin Kong <sup>a\*</sup>, Ze-peng Wang <sup>a</sup>, Zhe Ji <sup>b</sup>, Jin-fu Chen <sup>a\*</sup>, Chun-mei Guo <sup>a</sup>, Guangdong Sun,

8

Yuefeng F. Xie <sup>c</sup>

9

10 <sup>a</sup> State Key Laboratory of Heavy Oil Processing, Beijing Key Laboratory of Oil & Gas Pollution

11 Control, China University of Petroleum, Beijing 102249, China

12 <sup>b</sup> College of Marine Science and Biological Engineering Qingdao University of Science and

13 Technology, Qingdao, 266042, China

14 <sup>c</sup> Environmental Engineering Programs, The Pennsylvania State University, Middletown, PA

15 17057, USA

16

17

18

19

Submitted to

20

**Environmental Science-Water Research & Technology**

21

May 2019

22

23

24

25

26

27

28

---

29 \* Corresponding author: Dr. Fan-xin Kong and Dr. Jin-fu Chen, Tel.: +86-10-8973

30 3637;

31 Email: [kfx11@cup.edu.cn](mailto:kfx11@cup.edu.cn)

## 32 **S1. The operational parameters on the MD flux**

### 33 **Temperature**

34 The water flux linearly increase with the increase of feed water temperature. When  
35 the feed water increase from 50 to 95°C, the water flux almost increased from  $6.13 \times 10^{-7}$   
36 to  $3.77 \times 10^{-6}$  m/s with the feed velocity increased from 0.4 (corresponding to Reynolds  
37 number of 33.68) and the cold water velocity of 12.90 cm/s (corresponding to the  
38 Reynolds number of 21.67) (Fig. S1). The flux was proportional to the vapor pressure  
39 across the membrane. According to Antoine equation, the vapor pressure of pure water  
40 ( $P_0$ ) at the liquid–vapor interface exponentially increased with temperature [1, 2].  
41 Therefore, the vapor pressure difference across the membrane increased and the driving  
42 force increased as feed temperature increased. Moreover, viscosity of feed water  
43 decrease with the increase of temperature, and thus decrease the mass transfer boundary  
44 layer thickness and increase water flux.

### 45 **Velocity**

46 The feed and permeate water temperature was respectively maintained at 5 and 95  
47 °C with the cold water velocity of 12.90 cm/s (corresponding to the Reynolds number  
48 of 21.67). Under these conditions, water flux linearly increased from  $3.56 \times 10^{-6}$  to  
49  $5.90 \times 10^{-6}$  m/s with the feed velocity increased from 0.4 (corresponding to Reynolds  
50 number of 33.68) to 1.45 cm/s (corresponding to Reynolds number of 121.85) (Fig.  
51 S2). With feed velocity further increase of to 2.24 cm/s (corresponding to Reynolds  
52 number of 188.13), the water flux only slightly increased to  $6.07 \times 10^{-6}$  m/s. Previous  
53 studies [3, 4] also indicated that permeate flux increased as feed velocity increased and  
54 reach an asymptotic value when feed velocity increased. The optimal cross-flow  
55 velocity was 1.5 cm/s for feed water and 12.90 cm/s for cold water.

56

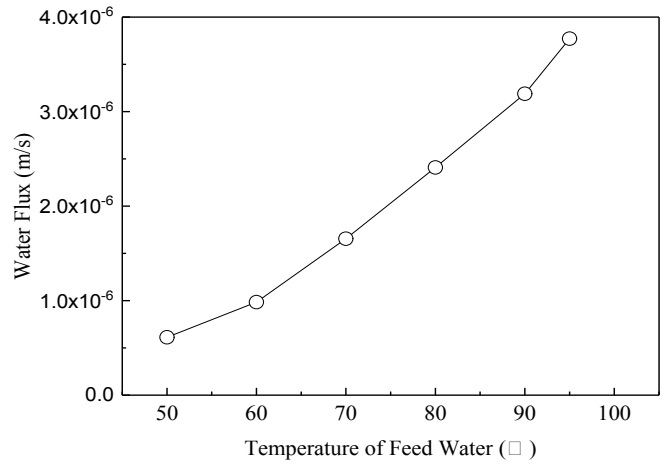

57

58

Fig.S. 1. Water flux change with the variation of feed water temperature.

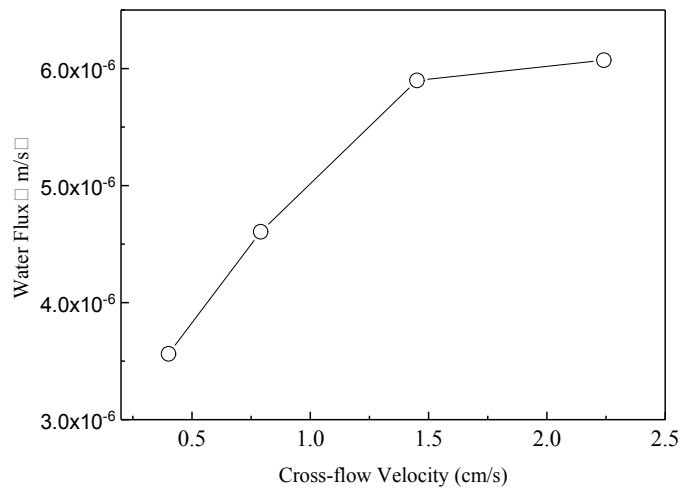

59

60

Fig.S. 2. Water flux change with the variation of cross-flow velocity of the feed water

61 **S2. The concentration factor for MD under different scenarios.**

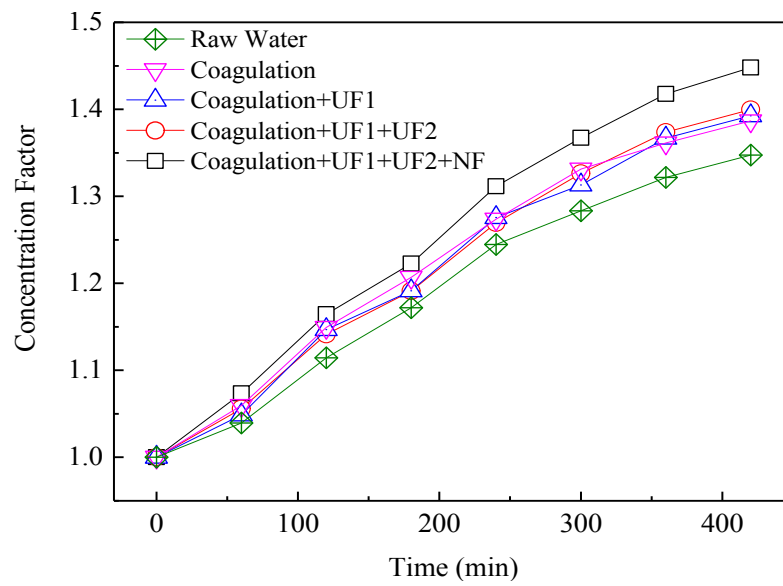

62

63 Fig.S. 3. Concentration factors of MD process with different pretreatment as the feed  
64 water.

65

66 **S3. The elemental composition of crystallization on the membrane surface**

67

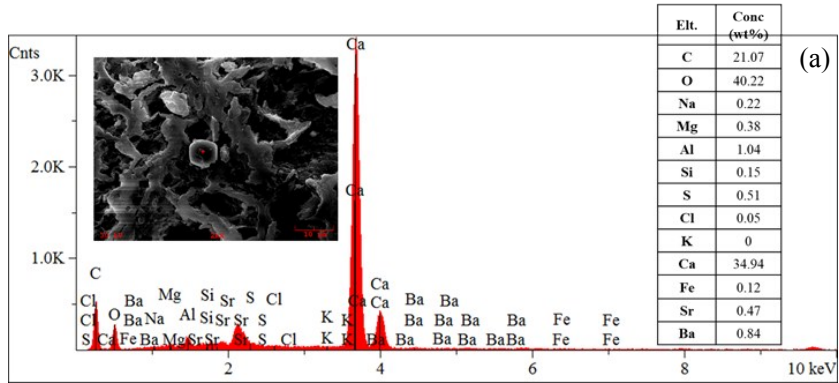

68

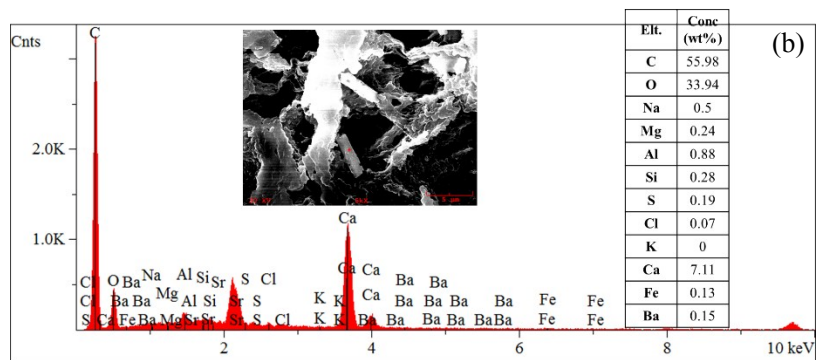

69

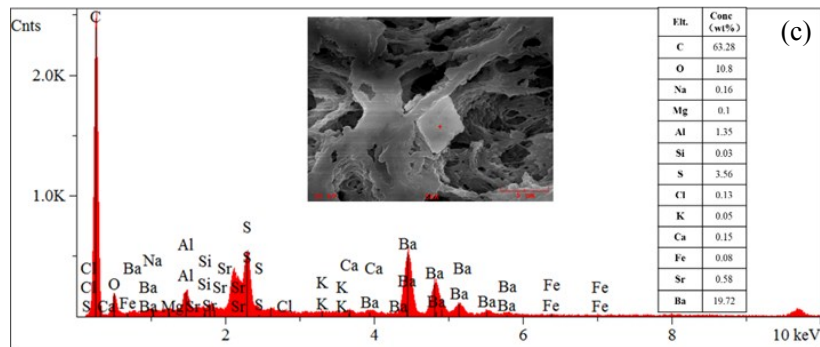

70

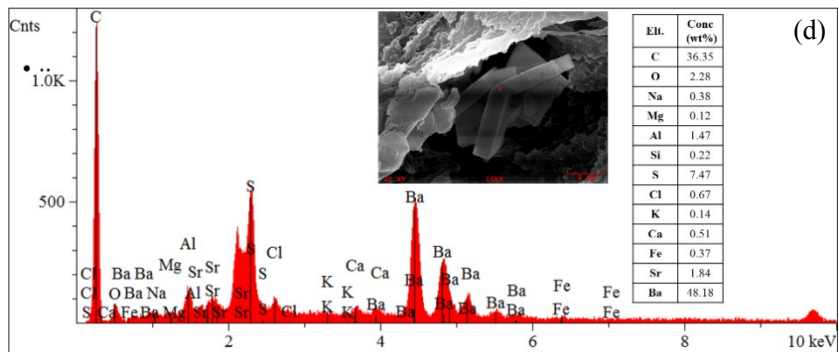

71

72 Fig.S. 4. The elements composition of the crystallization in the membrane surface (a)  
73 Raw water (b) Pretreated by coagulation (c) Pretreated by coagulation+UF1 (d)  
74 Pretreated by coagulation+UF1+UF2.

75

## 76 **References**

77 [1] L.D. Tijging, Y.C. Woo, J.-S. Choi, S. Lee, S.-H. Kim, H.K. Shon, Fouling and its  
78 control in membrane distillation—A review, *J. Membr. Sci.*, 475 (2015) 215-244.

79 [2] J. Wu, K.R. Zodrow, P.B. Szemraj, Q. Li, Photothermal nanocomposite membranes  
80 for direct solar membrane distillation, *Journal of Materials Chemistry A*, 5  
81 (2017).23712-23722

82 [3] X. Yang, R. Wang, A.G. Fane, Novel designs for improving the performance of  
83 hollow fiber membrane distillation modules, *J. Membr. Sci.*, 384 (2011) 52-62.

84 [4] X. Yang, R. Wang, L. Shi, A.G. Fane, M. Debowski, Performance improvement of  
85 PVDF hollow fiber-based membrane distillation process, *J. Membr. Sci.*, 369 (2011)  
86 437-447.

87
